# Supplementary material
Source: PubMed Central journal article supplement (PMC5007784)
Supplement: AEM.01201-16_zam999117400so1.pdf [file AEM.01201-16_zam999117400so1.pdf]

1 **Supplemental Materials**

2 **A Novel Tetrahydrofolate (THF)-dependent Methyltransferase**  
3 **Catalyzing the Demethylation of Dicamba in *Sphingomonas* sp. Ndbn-20**

4 Li Yao,<sup>a</sup> Lin-Lu Yu,<sup>a</sup> Jun-Jie Zhang,<sup>a</sup> Xiang-Ting Xie,<sup>c</sup> Qin Tao,<sup>c</sup> Xin Yan,<sup>a</sup> Qing Hong,<sup>a</sup>  
5 Ji-Guo Qiu,<sup>a</sup> Jian He<sup>\*,a,b</sup> and De-Rong Ding<sup>\*,c</sup>

6 <sup>a</sup> Key Laboratory of Agricultural Environmental Microbiology, Ministry of Agriculture, College of  
7 Life Sciences, Nanjing Agricultural University, Nanjing, Jiangsu 210095, PR China.

8 <sup>b</sup> Laboratory Centre of Life Science, College of Life Sciences, Nanjing Agricultural University,  
9 Nanjing, Jiangsu 210095, PR China.

10 <sup>c</sup> DBN Biotech Center, Beijing DBN Technology Group Co., Ltd. Address: NO. 2, Yuanmingyuan  
11 West Road, Haidian District, Beijing 100193, PR China.

12

13 \* Author for correspondence: Jian He and De-Rong Ding

14 E-mail address: hejian@njau.edu.cn; Derong.Ding@dbn.com.cn

15

16 Tel: +86-25-84396685; Fax: +86-25-84395326

17

18 **Running title:** Tetrahydrofolate (THF)-dependent dicamba methyltransferase

19 **Keywords:** Dicamba; Tetrahydrofolate (THF)-dependent methyltransferase; Dicamba  
20 resistance; *Sphingomonas* sp. Ndbn-20

21

22 **FIG S1** Construction route of the recombinant vector pDBN10879. AtUbi10 represents  
23 the promoter of the *Arabidopsis thaliana* polyubiquitin10 gene; AtCTP2 represents the  
24 chloroplast transit peptide coding sequence of the *Arabidopsis thaliana* EPSP synthase  
25 gene; tCaMV35S represents the terminator of the cauliflower mosaic virus 35S gene;  
26 prCaMV35S represents the promoter of the cauliflower mosaic virus 35S gene; PAT  
27 represents the glufosinate resistance gene; and Dmt represents the optimized *dmt* gene.

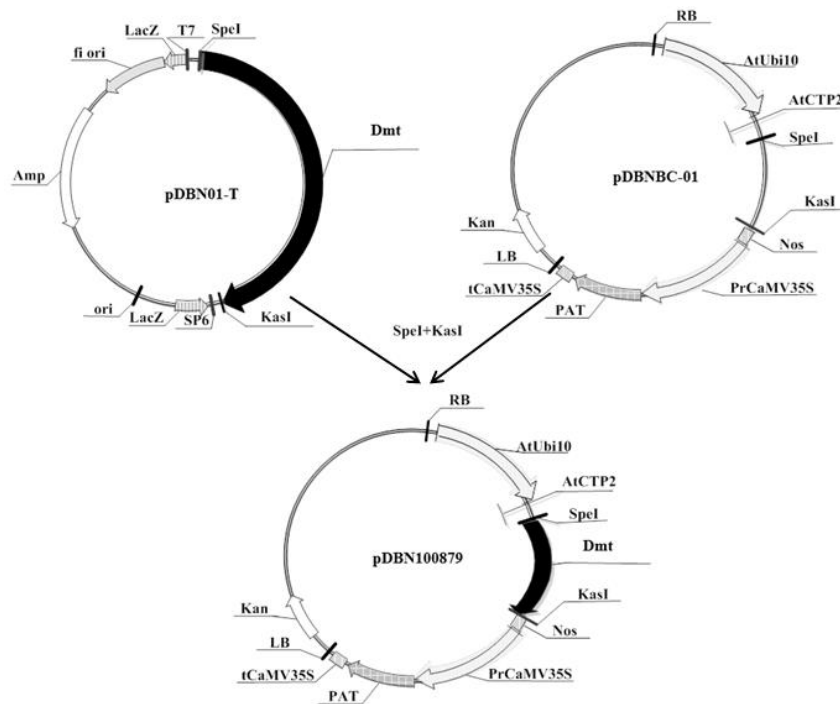

28

29

30 **FIG S2** SDS-PAGE analysis of the purified methyltransferases from scaffold 02 (A) and  
31 Dmt (B). The proteins were separated on a 12% SDS-polyacrylamide gel and stained with  
32 Coomassie brilliant blue. (A) Lane M, molecular mass standards; lane 1, purified  
33 His<sub>6</sub>-methyltransferase from scaffold 02. (B) Lane M, molecular mass standards; lane 1,  
34 purified His<sub>6</sub>-Dmt.

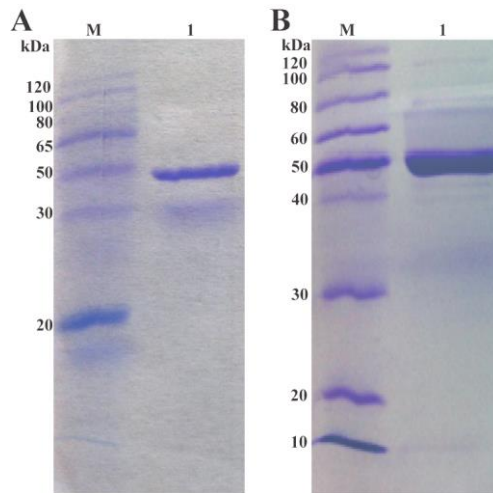

35

36

37 **FIG S3** HPLC analysis of the products during dicamba conversion by Dmt  
38 (methyltransferase from scaffold 66). A and C, HPLC spectrum of the dicamba  
39 conversion without or with Dmt, respectively. The sample was dissolved in methanol, and  
40 the mobile phase was a mixture of ultrapure water (58.4%), acetonitrile (31.7%),  
41 methanol (7.5%) and acetic acid (2.4%). The dotted line indicates dicamba (275 nm), and  
42 the solid line indicates metabolite 1 (319 nm). B and D, HPLC spectrum of the THF  
43 conversion without or with Dmt, respectively. The sample was dissolved in 0.1 mol/L  
44  $\text{KH}_2\text{PO}_4$  buffer, the mobile phase was a mixture of 0.05 mol/L of pH 3.0  $\text{KH}_2\text{PO}_4$  buffer  
45 (90%) and acetonitrile (10%), and the detection wavelength was 298 nm.

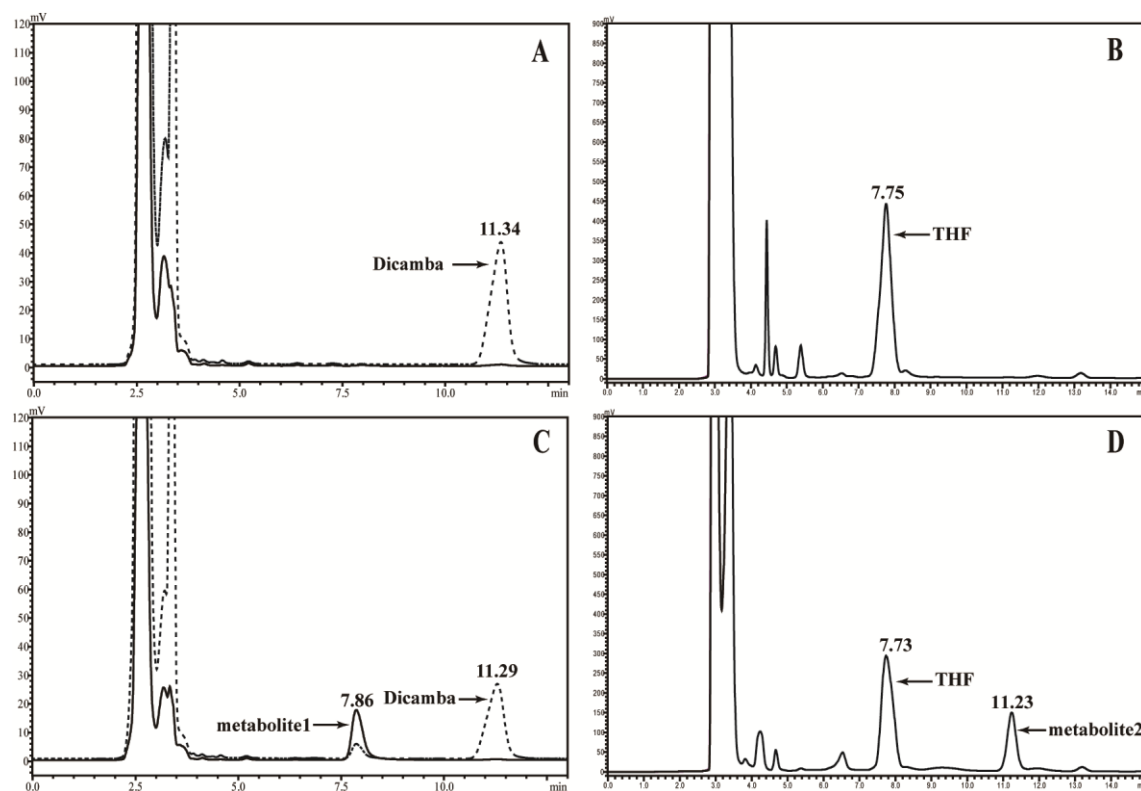

46

47

48 **FIG S4** DNA elements in the *dmt* gene cluster promoter. The -35 and -10 boxes are  
49 shown in boxes, and the TSS is shown by an arrowhead.

CAA<sup>-35 box</sup>**TTGGCA**AGGAGATTTTCCCGAA<sup>-10 box</sup>**CGTCATGAT**GGGAG<sup>TSS</sup>CGATATAAGCCCTTGCC  
CATGTGGAAACGTTCCCATATTGATATGGCAGGGTCGTCGGGTGGTTCGCCGTCTTTCC  
CGCTGGCCAATGCGCATCGCCGCCTTGCCCAGCGGGTCAGGGCGCGGCCGCTAGGGTC  
GGCTTCGTCTTGCCGGAGTGTCGAAAACGCACCGGCCAGATCCAATTTATATCACGG  
AGAGAGGT**ATGGTG**  
Dmt →

50

51

52 **FIG S5** Transcriptional analysis of *dmt*, *metF*, *purU* and *dhc* in scaffold 66 of strain  
53 Ndbn-20 grown with glucose or dicamba. A: Agarose gel electrophoresis of the RT-PCR  
54 products using the 16S rRNA gene as an internal control. B: Relative expression levels of  
55 the four genes, as determined by RT-qPCR. The data were derived from three  
56 independent measurements, and the error bars indicate standard deviations.

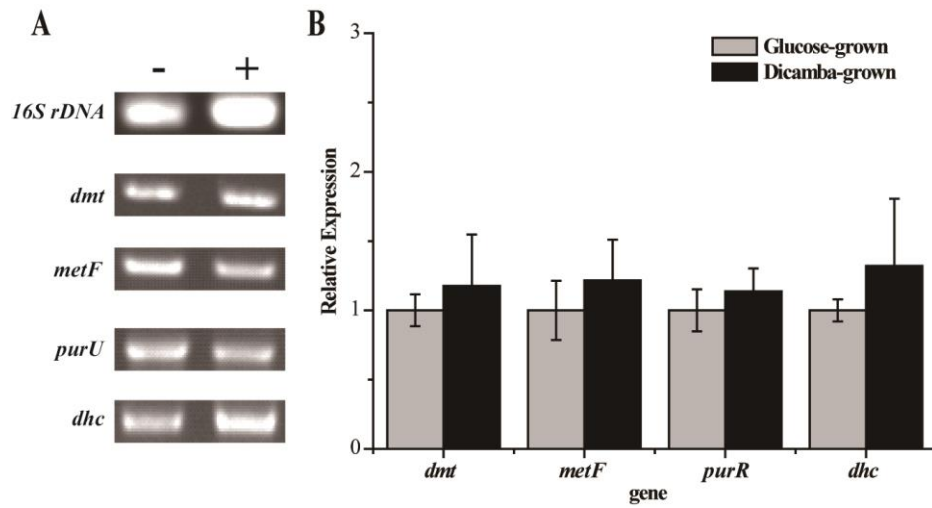

57

58

59 **FIG S6** Effect of temperature (A) and pH (B) on the activity of Dmt. For the temperature  
60 test, Dmt was incubated under standard conditions at pH 8.0 and different temperatures  
61 (20-45 °C) for 10 min, and the relative activity was calculated by assuming that the  
62 activity observed at 30 °C was 100%. For the pH test, Dmt was incubated in the pH range  
63 of 5.0 to 10.0 at 30 °C for 10 min, three different buffering systems were used: ■ indicated  
64 100 mM phosphate buffer (pH 5.0 to 6.5), ● indicated 100 mM Tris HCl buffer (pH 6.2 to  
65 8.5) and ▲ indicated 100 mM glycine-NaOH buffer (pH 8.2 to 10.0). The relative  
66 activity was calculated by assuming that the activity observed at pH 7.0 was 100%.

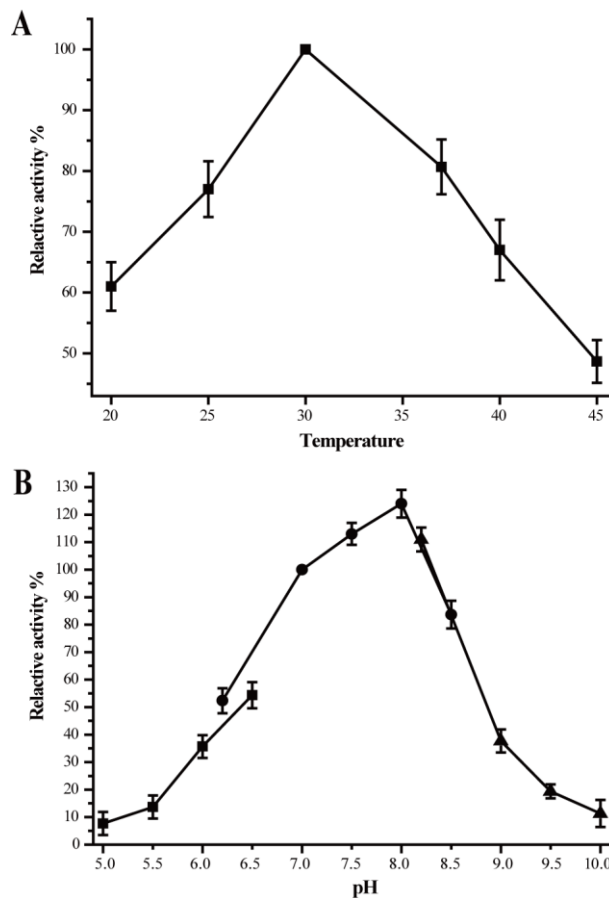

67

68

69 **FIG S7** Alignment of nucleotide sequences of the *dmt* gene and the codon-optimized *dmt*

70 gene. The nucleotides optimized were marked out in red.

|                             |                                                                                                                                       |      |
|-----------------------------|---------------------------------------------------------------------------------------------------------------------------------------|------|
| <i>dmt</i>                  | ATG GTG <b>CGG TCG</b> GTT CAG GAC ATT GTC GAT GAC AAC CCG GAC TTG GTG AAC TAT TTC AAA TAC CAG ACC GGA GGA TAC CCG ACC GCA TCG        | 90   |
| codon-optimized_ <i>dmt</i> | ATG GTG <b>AGA AGC</b> GTT CAG GAT ATT GTG GAT GAC AAC CCA GAC CTG GTT AAT TAC TTC AAG TAT CAA ACA GGC GGA TAC GCC ACC GCT TCA        | 90   |
| Consensus                   | atg gtg g gtt cag ga att gt gat gac aac cc gac tg gt aa ta ttc aa ta ca ac gg gga tac gc age gc tc                                    |      |
| Amino acid                  | M V R S V Q D I V D D N P D L V N Y F K Y Q T G G Y A S A S                                                                           |      |
| <i>dmt</i>                  | CTC ATC GAC ATC <b>CTT</b> CCG CCT TTC ATT CCT GCC GAG TTC ACG AAT TGG <b>CGC</b> GAG GAG CAG CGC GCT TGG CAC GAA CCG CCG GTG ATG TTC | 180  |
| codon-optimized_ <i>dmt</i> | CCT ATT GAT ATC <b>TTG</b> CCG CCT TTC ATC CCC GCC GAG TTT ACG AAC TGG <b>AGG</b> GAG GAA CAG CGC GCT TGG CAT GAA GCC GCT GTT ATG TTT | 180  |
| Consensus                   | ct at ga atc t cgg cct ttc at cc gcc gag tt acg aa tgg g gag ga cag cgc gct tgg ca gaa gc gc gt atg tt                                |      |
| Amino acid                  | L I D I L R P F I P A E F T N W R E E Q R A W H E A A V M F                                                                           |      |
| <i>dmt</i>                  | GAC CAG <b>TCG CAT CAC</b> ATG TCA GTG ACC TAC ATC AAG GGT CCG GAT GCC AAG CCG ATG CTG AAT TAT CTG <b>TCG CCG TCC</b> ACC TTC TCC AAT | 270  |
| codon-optimized_ <i>dmt</i> | GAT CAA <b>ACG CAC CAT</b> ATG TCA GTC ACC TAC ATT AAG GGG CCG GAC GCA AAA CCG ATG CTC AAC TAT CTG <b>AGT CCA TCG ACC</b> TTC TCC AAT | 270  |
| Consensus                   | ga ca ca ca atg tca gt acc tac at aag gg ccg ga g ca aa gcc atg ct aa tat ctg cc tc acc ttc tcc aat                                   |      |
| Amino acid                  | D Q S H H M S V T Y I K G P D A K A M L N Y L S P S T F S N                                                                           |      |
| <i>dmt</i>                  | CTG TCC ACC GAT CGT GGC AAA CAA TAT TTC GTC GCC AAT CCC GAC GGC AAG CAT ATC GGC GAC TGT GTC CTT CAT TAT TAT CCG GAT GAT               | 360  |
| codon-optimized_ <i>dmt</i> | CTC TCT ACT GAT CCC GGC AAG CAG TAC TTT GTC GCA AAT CCT GAT GGG AAA CAC ATT GGC GAC TGC GTG CTG CAT TAC TAT CGA GAT GAC               | 360  |
| Consensus                   | l t c ac gat cg ggc aa ca ta tt gtc ga ac cc pa dd g ka ca at ggc gac tg gt ct cat ta tat ggc gat ga                                  |      |
| Amino acid                  | E S T D R G K Q Y F V A N P D G K H I G D C G V L H Y Y G D D                                                                         |      |
| <i>dmt</i>                  | GAG GGG TTC GAG CTG ATC AGC GGC AAT CCG CTG CAA <b>AGC TGG</b> GTG <b>CGG</b> TAC CAT TGC CAG ACG GGC GAA TAT AAC GTC GAG CCG AGG CAC | 450  |
| codon-optimized_ <i>dmt</i> | GAG GGT TTC GAA CTC ATC AGT GGG AAC CCC CTG CAG <b>TCG TGG</b> GTG <b>AGA</b> TAC CAC TGT CAA ACA GGC GAG TAT AAT GIT GAA GCC CGG CAC | 450  |
| Consensus                   | gag gg ttc ga ct atc ag ggc aa cc ctg ca tgg gtg g tac ca tg ca ac gcc ga tat aa tv ea ge gcc cac                                     |      |
| Amino acid                  | E G F E L I S G N P L Q S W V R Y H C Q T G E Y N V E A R H                                                                           |      |
| <i>dmt</i>                  | GAT CCA <b>ACG TCA CCC TTG</b> GCC AAA GGG CAC CCG CCG AAG AAT TAT <b>CGC</b> TTT CAG CTT GAA GGC CCC AAC GCC CCG CAG ATC CTC GAT GAT | 540  |
| codon-optimized_ <i>dmt</i> | GAC CCG <b>TCC TCT CCA CTC</b> GCC AAG GGA CAT AGG CCG ACG AAA TAT <b>AGG</b> TTC CAG CTC GAG GGC CCT AAC GCT CCG CAA ATC CTG GAT GAC | 540  |
| Consensus                   | ga cc c tc cc t ggc aa gg ca gg eg ac aa tat g tt cag ct ga ggc cc aac gc cg ca atc ct gat ga                                         |      |
| Amino acid                  | D P S S P L G K G H R R T K Y R F Q L E G P N A R Q I L D D                                                                           |      |
| <i>dmt</i>                  | GTC TCC GGT GGA GGA ATG CCA GAG CTC CAG TTT TTC CCG ACC CCA TTC GTC ACC ATC GCG GGC TGC CCG GTC CAC ATC CTG CCG CAT GCC               | 630  |
| codon-optimized_ <i>dmt</i> | GTC TCC GGT GGT GGG ATG CCC GAG CTT CAA TTT TTC AGG ACA GCA TTT GTC ACG ATC GCG GGA TGT AGG GTG CAC ATA TTG AGG CAC GCC               | 630  |
| Consensus                   | gtc tcc gt gg gg atg cc gag ct ca tt tt g ac ge tt gtc ac atc gcc gg tg g gt cac at tg gg ca ggc                                      |      |
| Amino acid                  | V C V G G M P E L Q F F R T A F V T I A G C R V H I L R H G                                                                           |      |
| <i>dmt</i>                  | ATG GCC GCC CAT ACC GGC GCA GAG ATC TCC GGT CCC TGG GAC GAG ATG GAC ACC GGT CGT GAT CCG ATC CTG AAG CCC GCC GAA AAG CTC               | 720  |
| codon-optimized_ <i>dmt</i> | ATG GCC GGA CAT ACA CGT GCT GAG ATC TCA GGT CCG TGG GAT GAG ATG GAT ACG GTG CCC GAT GCA ATA CTT AAG CCG GGG GAG AAA CTT               | 720  |
| Consensus                   | atg gcc gg cat acc ggc gca gag atc tcc ggt cc tgg gac gag atg gat acg gtg ccc gat gca ata ctt aag ccg ggg gag aa ctt                  |      |
| Amino acid                  | M A G H T G A E I S G P W D E M T V R D A I L K A G E K L I                                                                           |      |
| <i>dmt</i>                  | GGC CTG CCG CCG GCC GGC ACA TGG GCT TAC TAC ACC CCG ACC CTG GAG AAT GGA TGG ATC CCG ACG CCC TTC CCC CCG ATT TAC ACC AGC               | 810  |
| codon-optimized_ <i>dmt</i> | GGC CTC AGG AGG GCC GGA ACA TGG GCC TAC TAT TCA GCT ACG TTG GAG AAC GGC TGG ATT CCA ACC CCT TTC CCC CCT ATC TAC ACC TCC               | 810  |
| Consensus                   | ggc ct g g ggc gg aca tgg gc tac ta gc ac t g gag aa gg tgg at cc ac cc ttc ccc gc at tac acc c                                       |      |
| Amino acid                  | G L R R G G T W A Y Y S A L T L E N G W I P T P F P A G Y T                                                                           |      |
| <i>dmt</i>                  | GAC GCA ATG AAG CCG TAT CCG GAG TGG CTG CCG GCA GCC AGT CTT GAA GGC CAG ATG CAC GTC GCT GGC ACG TAT TAT GGC GAG CAG ATC               | 900  |
| codon-optimized_ <i>dmt</i> | GAC GCA ATG AAG CCC TAC AGA GAG TGG CTC CCA GCA CCG AGT CTT GAG GGT CAG ATG CAC GTC GCA GGA TGG TAC TAT GGC GAG CAG ATA               | 900  |
| Consensus                   | gac gc atg aag cc ta g gag tgg ct cc gca gc agt ct ga gg cag atg cac gtc gc gg ta tat ggc gag ca at                                   |      |
| Amino acid                  | S D M K A Y R E W A P A A S L E G Q M H V A W S Y Y G E Q I                                                                           |      |
| <i>dmt</i>                  | GAG GAT TAT TAT TGG GAC CCG TGG TCG CTT GGC TAC GAC AAG TTC GTC AAG TTT GAT CAC GAC TTC ATC GCG CCG CCG CCG CTG GAG AAG               | 990  |
| codon-optimized_ <i>dmt</i> | GAA GAT TAC TAT TGG GAC CCG TGG TCC CTC GGG TAC GAT AAG TTC GTT AAA TTT GAT CAC GAC TTC ATC GCG AGG GCC CCT CTG GAG AAG               | 990  |
| Consensus                   | ga gat ta tat tgg gac gc tgg tc ct gg tac ga aag ttc gt aa ttt gat cac gac ttc atc ggc g gc gc ctg gag aag                            |      |
| Amino acid                  | E D Y Y W D A W S L G Y D K F V K F D H D F I G R A A L E K                                                                           |      |
| <i>dmt</i>                  | ATG AAG CCG CAG CCT CAT CGT GTC AAA CCG CTC CTG GTG TGG AAC GAA GAC GAT GTC ATG AAG GTG ATG CCG TCG CAA TTC GCC GAT CCG               | 1080 |
| codon-optimized_ <i>dmt</i> | ATG AAA CCG CAG CCA CAT AGA GTC AAG CCG CTC CTG GTC TGG AAC GAA GAT GAC GTC ATG AAA GTG ATG GCA TCT CAA TTC GCC GAT CCG               | 1080 |
| Consensus                   | atg aa ccg cag cc cat g gtt aa cg etc ctg gt tgg aac gaa ga ga gtc atg aa gtg atg gc tc caa ttc ggc gat gg                            |      |
| Amino acid                  | M K P Q P H R V K R L L V W N E D D V M K V M A S Q F G D G                                                                           |      |
| <i>dmt</i>                  | CCA ATC TAT AAA CCG ATC GAC ATG CCG CTG GCC TTT TAT GGC CTG CCA CAG GCC GAT GAC GTC CCG TCG ACC GAC GGC CGA CAT GTC GCC               | 1170 |
| codon-optimized_ <i>dmt</i> | CCT ATA TAC AAG GCA ATT GAC ATG CCT CTT CCG TTT TAT GGA ITG CCC CAG CCG GAT GAC GTG AGA AGC ACC GAT GGC CGG CAC GTT GCC               | 1170 |
| Consensus                   | cc at ta aa ge at gac atg cc ct gc ttt tat gg tg cc cag gc gat gac gt g acc ga ggc cg ca gt ggc                                       |      |
| Amino acid                  | P I Y K A I D M P L A F M G L P Q A D D V R S T D G R H V G                                                                           |      |
| <i>dmt</i>                  | GTG TCG CAA TGG TGC GGT TAC ACG GTC AAT GAG CAC CCG ATG ATG TCG CTT TGC GGG ATC GAC GAG GCA TCC GCC CCG CCG GGT ACC GAA               | 1260 |
| codon-optimized_ <i>dmt</i> | GTG TCC CAA TGG TGC GGA TAC ACT GTT AAT GAG CAT AGG ATG ATG TCC CTT TGT GGT ATA GAC GAA CCG TCT CGA CCG CCG GGA ACA GAG               | 1260 |
| Consensus                   | gtg tc caa tgg tgc gg tac ac gt aat gag ca gg atg atg tc ctt tg gg at gac ga ge tc ge gcc ccg gg ac ga                                |      |
| Amino acid                  | V S Q W C G Y T V W E H R M M S L C G I D E A S A A P G T E                                                                           |      |
| <i>dmt</i>                  | GTC GTC ATC ACC TGG GGC GAG CCG AAC GGC GGC CCG CCA AAT CCG CAA ACC GAA CGT CAT GAG CAG ACG ACG ATC CCC CCG ACG GTG CCG               | 1350 |
| codon-optimized_ <i>dmt</i> | GTG GTC ATT ACG TGG GGT GAA AGG AAC GGT GGG GCT CCA AAT AGA CAG ACT GAG CCG CAC GAA CAA ACC ACT ATT CCC CCG ACC GTT GCT               | 1350 |
| Consensus                   | gt gtt at ac tgg gg ga g aac gg g gc cc aat g ca ac ga cg ca ga ca ac ac at cgc gc ac gt gc                                           |      |
| Amino acid                  | V V I T W G E R N G G G P A N R Q T E R H E Q T T I R A T V A                                                                         |      |
| <i>dmt</i>                  | CIT ACC CCG GCC GAT GCC CTG TCG CAG GCC CCG GTC CCC CCG ACG CTC                                                                       | 1398 |
| codon-optimized_ <i>dmt</i> | CTT ACT CCA GCA GAC GCT TTG TCC CAG GGA AGG GTC CCG CCA ACA TTG                                                                       | 1398 |
| Consensus                   | ctt ac cc gc ga ge tg tc cag gg gg gtc ccg ccg acc ctg                                                                                |      |
| Amino acid                  | L T P A D A L S Q G R V P Q G R                                                                                                       |      |
